# Supplementary figures and images for: Redox-sensitive enzyme SENP3 mediates vascular remodeling via de-SUMOylation of β-catenin and regulation of its stability
Source: PubMed Central journal article supplement — eBioMedicine. 2021 May 14;67:103386. doi: 10.1016/j.ebiom.2021.103386 (PMC8138600; doi:10.1016/j.ebiom.2021.103386), 2021-05-14

Fig. 3a

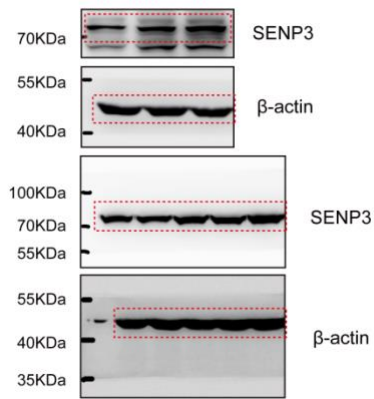

Fig. 3b

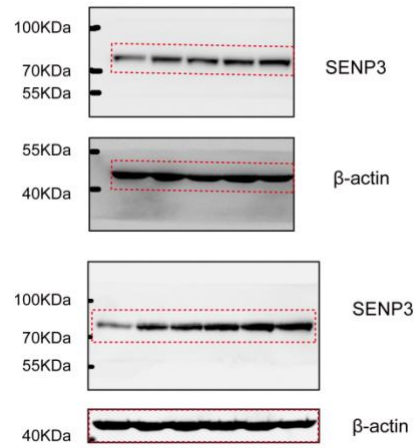

Fig. 3d

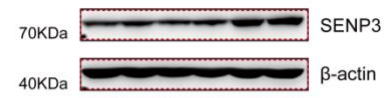

Fig. 3e

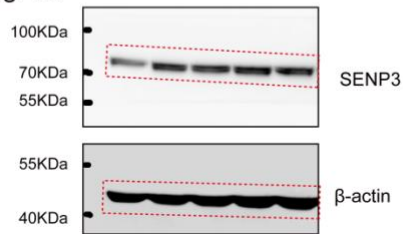

Fig.3f

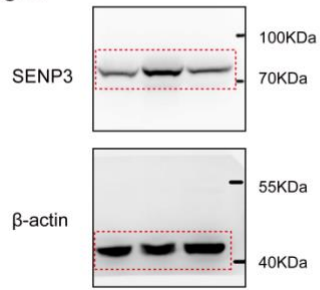

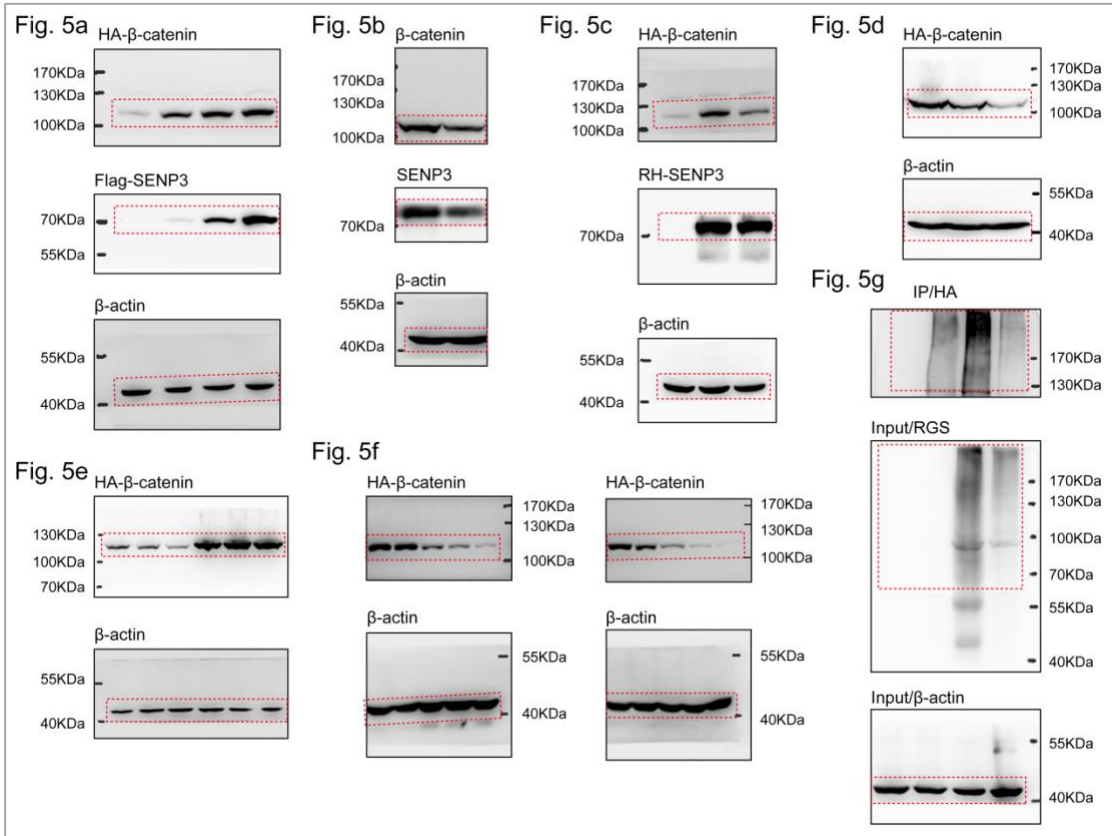

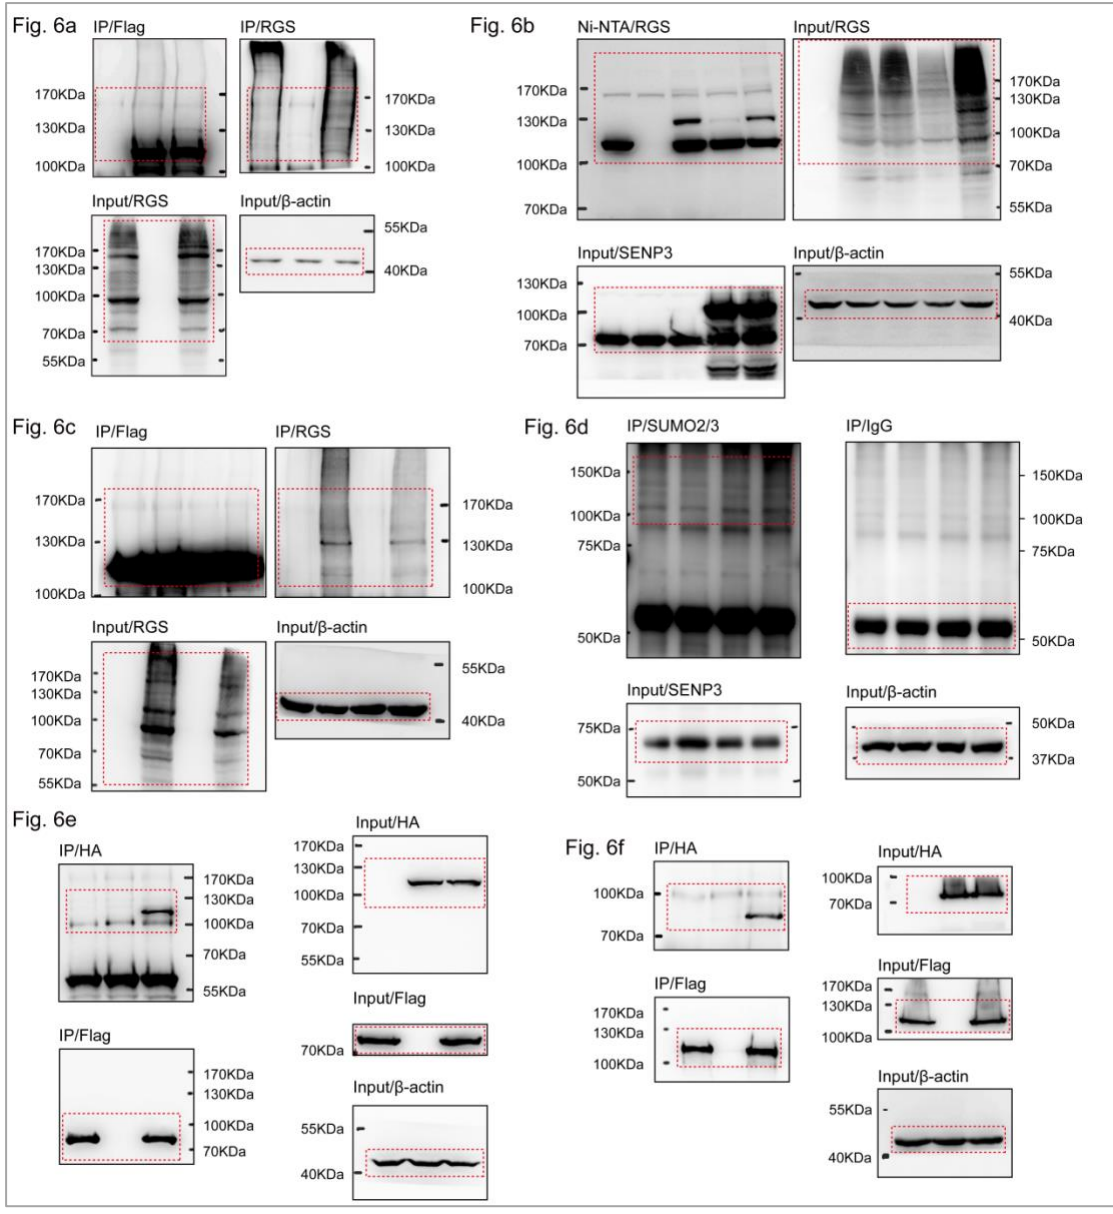

Supplement: mmc2.pdf [file mmc2.pdf]
